# Supplementary material for: Effects of sigh during pressure control and pressure support ventilation in pulmonary and extrapulmonary mild acute lung injury
Source: PubMed Central journal article supplement (PMC4155110; doi:10.1186/s13054-014-0474-4), 2014-08-12
Supplement: 13054_2014_474_MOESM1_ESM.pdf [file 13054_2014_474_MOESM1_ESM.pdf]

Additional File 1 **Table S1.** Mean Arterial Pressure

| MAP           | ALIp      |            |            |            | ALlexp     |            |            |            |
|---------------|-----------|------------|------------|------------|------------|------------|------------|------------|
|               | PCV       |            | PSV        |            | PCV        |            | PSV        |            |
| Time (min)    | NS        | Sigh       | NS         | Sigh       | NS         | Sigh       | NS         | Sigh       |
| Baseline PEEP | 82.8±12.1 | 92.0±20.6  | 125.4±18.8 | 107.4±20.9 | 102.4±22.9 | 101.0±20.2 | 120.3±25.4 | 121.4±23.0 |
| 15            | 90.1±18.5 | 85.8±15.5  | 113.8±15.1 | 102.1±24.7 | 106.8±10.1 | 95.2±16.0  | 115.5±25.8 | 116.5±23.4 |
| 30            | 92.1±14.4 | 89.8±13.7  | 112.5±14.9 | 99.6±20.3  | 110.0±13.9 | 89.1±14.9  | 107.3±38.7 | 109.5±27.8 |
| 45            | 96.3±15.3 | 94.7±10.3  | 114.9±11.2 | 96.7±19.3  | 107.3±17.5 | 84.9±22.1  | 118.2±25.3 | 107.3±28.2 |
| 60            | 94.9±15.4 | 101.1±20.4 | 108.0±13.3 | 94.0±17.0  | 110.0±16.6 | 88.6±22.2  | 114.3±24.4 | 110.6±23.5 |

Mean arterial pressure (MAP) at different time points (Baseline PEEP, 15, 20, 45, and 60 min). Values are mean ± SD of six rats in each group. PCV: pressure control ventilation; PSV: pressure support ventilation; NS: non-sigh.
